# Sub-type selective muscarinic acetylcholine receptors modulation for the treatment of parkinsonian tremor

Kinsey Bickham<sup>1\*</sup>, C. Price Withers<sup>1\*</sup>, Augusto Diedrich<sup>1</sup>, and Mark Stephen Moehle<sup>2†</sup>

<sup>1</sup>Department of Pharmacology and Warren Center for Neuroscience Drug Discovery,  
Vanderbilt University, Nashville, TN 37232, USA

<sup>2</sup>Department of Pharmacology & Therapeutics and Center for Translational Research in  
Neurodegeneration, University of Florida, Gainesville, FL 32610

\*These authors have contributed equally and should be considered co-first authors

†Corresponding author: [mark.moehle@ufl.edu](mailto:mark.moehle@ufl.edu)

# Abstract

Parkinson's Disease is characterized by hallmark motor symptoms including resting tremor, akinesia, rigidity, and postural instability. In patient surveys of Parkinson's Disease symptoms and quality of life, tremor consistently ranks among the top concerns of patients with disease. However, the gold standard of treatment, levodopa, has inconsistent or incomplete anti-tremor effects in patients, necessitating new therapeutic strategies to help relieve this burden. Non-selective anti-muscarinic acetylcholine receptor therapeutic agents which target each of the 5 muscarinic receptor subtypes have been used as an adjunct therapy in this disease, as well as other movement disorders, and have been shown to have anti-tremor efficacy. Despite this, anti-muscarinic therapy is poorly tolerated due to adverse effects. Recent pharmacological advances have led to the discovery of muscarinic subtype selective antagonists that may keep the anti-tremor efficacy of non-selective compounds, while reducing or eliminating adverse effects. Here, we directly test this hypothesis using pharmacological models of parkinsonian tremor combined with recently discovered selective positive allosteric modulators and antagonists of the predominant brain expressed muscarinic receptors M<sub>1</sub>, M<sub>4</sub>, and M<sub>5</sub>. Surprisingly, we find that selective modulation of M<sub>1</sub>, M<sub>4</sub>, or M<sub>5</sub> does not reduce tremor in these pre-clinical models, suggesting that central or peripheral M<sub>2</sub> or M<sub>3</sub> receptors may be responsible for the anti-tremor efficacy of non-selective anti-muscarinic therapies currently used in the clinic.

# Introduction

Parkinson's disease (PD) is the second most common neurodegenerative disorder worldwide, with a prevalence of 1% for individuals above 60 years of age(1). PD is characterized by resting tremor, rigidity, akinesia/bradykinesia, and postural instability, as well as several non-motor symptoms(2). The current standard of treatment for PD is dopamine (DA) replacement through the administration of the DA precursor levodopa (L-dopa). However, chronic L-dopa treatment can lead to severe adverse effects or is not highly efficacious at treating certain PD motor symptoms, such as resting tremor and gait and several non-motor symptoms(1, 3).

Resting tremor is consistently reported as the one of the most troublesome motor symptoms of PD(4-6). In PD patient surveys, tremor is among the most frequently mentioned symptoms, and it is consistently ranked as the most important symptom to alleviate(5). Additionally, tremor is one of the most common symptoms that drives neurologists to modify ongoing anti-parkinsonian drug treatments(4). Unfortunately, tremor response to L-dopa is highly variable(6), highlighting the unmet clinical need of new therapeutic options targeting tremor in PD patients.

Anti-muscarinic therapeutics which target each of the 5 muscarinic acetylcholine receptor subtypes (mAChRs,  $M_1$ - $M_5$ ) were among the first widely accepted treatments for PD (7, 8). Anti-mAChRs have efficacy in reducing parkinsonian tremor(7). Despite their efficacy, non-selective anti-mAChR therapy has limited clinical utility due to the potentially severe peripheral and central adverse effects(3, 9, 10) . Recent advances in our understanding of the roles of each mAChR subtype have yielded the possibility that targeting individual mAChRs may maintain the efficacy observed with non-selective

therapeutics while reducing or eliminating the adverse effects(10, 11). Yet, this requires further knowledge of each receptor's activity in both pre-clinical models of disease as well as normal physiological processes.

Preclinical studies suggest that  $M_2$  and  $M_3$  underly the adverse peripheral side effects associated with non-selective anti-mAChR therapeutics, and, while expressed in the central nervous system, have higher expression in peripheral organs(3, 11-14). Conversely,  $M_1$ ,  $M_4$ , and  $M_5$  are the brain predominant mAChRs and have higher expression in the central nervous system compared to the periphery(11, 12).  $M_1$ ,  $M_4$ , and  $M_5$  are expressed in multiple brain regions associated with PD pathophysiology including throughout several basal ganglia nuclei, cortical regions, and substantia nigra pars compacta dopaminergic cells (12, 15). These expression patterns suggest that the anti-parkinsonian efficacy of non-selective compounds may be through inhibition of  $M_1$ ,  $M_4$ , and  $M_5$ . Initial studies in 6-OHDA lesioned mice have suggested that this may indeed be the case with antagonism of  $M_1$  and  $M_4$  displaying anti-parkinsonian efficacy (16, 17). However, many of these studies have largely relied on non- or poorly-selective mAChR tool compounds and have not directly assessed parkinsonian tremor.

Parkinsonian tremor can be modeled in rodents with tremulous jaw movements (TJM)(18). These are vertical deflections of the rodent jaw that occur in a similar 3-7.5 Hz frequency range to the tremor of patients with PD (18, 19). TJMs are induced pharmacologically with dopamine depleting agents such as tetrabenazine and pro-cholinergic agents such as acetylcholinesterase inhibitors. TJMs can be reduced in frequency or severity by agents that treat tremor in PD patients including pro-dopaminergic therapies and non-selective anti-mAChRs (18, 19), suggesting that this

model has face and construct validity in determining novel therapeutics that will display anti-tremor efficacy in PD patients.

In this study, we used recently developed M<sub>1</sub>, M<sub>4</sub>, and M<sub>5</sub> mAChR subtype selective antagonists and positive allosteric modulators to manipulate the activity of M<sub>1</sub>, M<sub>4</sub>, and M<sub>5</sub> *in vivo* in relevant rodent models of parkinsonian tremor to understand how individual mAChRs regulate tremor. To accomplish this, we utilized two pharmacological agents, galantamine and tetraabenazine, which have distinct mechanisms of action to induce TJMs in mice. Galantamine works through increasing levels of acetylcholine by inhibiting this neurotransmitter's breakdown(20). Tetraabenazine induces TJMs through depletion of monoamines(19). Notably, both of the agents have been extensively used to induce TJMs previously. Using these highly selective compounds, as well as a non-selective anti-mAChR antagonist as a positive control, in this pharmacologically-induced TJM model we systematically tested the role of the brain predominant mAChRs in modulating tremor.

## Materials and Methods

### *Animals*

C57Bl6/J mice were purchased from Jackson Labs (Stock #000664). Male mice were purchased between 8-10 weeks of age, and all mice were used at ages starting at 10-12 weeks of age. Mice were maintained in AALAS approved vivariums on 12 hour light/dark cycles with *ad libitum* access to food and water. All studies were approved by the institutional animal care and use committee.

### *Pharmacological Agents*

VU0467154(21), VU06021625(9), VU0453595 (22), VU0255035 (23), and ML375 (24) were synthesized by the medicinal chemists of the Warren Center for Neuroscience Drug Discovery according to published protocols. Tetrabenazine, galantamine, and scopolamine were purchased from Tocris. VU0467154, VU0453595, and VU0255035 were dissolved in 10% Tween-80 (w/v) in sterile saline. VU0601625 and ML375 were dissolved in 20% hydroxy-propyl- $\beta$ -cyclodextrin. Galantamine and scopolamine were dissolved in sterile saline. Tetrabenazine was dissolved in 10% DMSO (w/v) in sterile water that had been acidified with 0.1% 1M HCL, and then pH adjusted once dissolved. All drugs were made fresh daily.

### *Tremulous Jaw Movements*

Mice were injected intraperitoneally with tetrabenazine or galantamine – 120 minutes and 30 minutes before recording, respectively. Each mAChR test ligand was injected subcutaneously 30 minutes in advance of recording. Ten minutes before recording, mice were placed on the observational setup for a habituation period; recordings lasted for 15 minutes. The observational chamber was a clear Plexiglas tube 10 cm in diameter with a mesh floor. The video camera recorded a ventral view of the mice through the mesh floor. Mice received each dose of drug in each drug group plus a vehicle and scopolamine in a within-subject design. With the exception of the dose responses curves of tetrabenazine and galantamine which were scored live, all videos were scored at a later date by reviewers blinded to the experimental conditions.

### *Data Analysis*

Videos were reviewed using Final Cut Pro by experimenters trained in the analysis of tremulous jaw movements. This program allows for frame-by-frame analysis

of movement. Experimenters were blinded to drug treatment and dose. All statistical analyses were performed in GraphPad Prism 9 (GraphPad, San Diego, CA). Statistical tests were used throughout the paper with the following scheme: If the data were normally distributed as determined by a D'Agostino and Pearson omnibus normality test, a repeated measures ANOVA was utilized with either a Sidak's or Dunnett's post-hoc comparison. If the data were not normally distributed a Friedman's test with Dunnett's post comparison was used. Because of the within subjects design, if data were missing, a Mixed Effects Model was used to analyze the data.

## Results

### *M4 Antagonists Do Not Reduce TJMs*

Before testing our mAChR test compounds, we first empirically determined the doses of tetrabenazine and galantamine that produced maximal TJMs and a threshold amount of TJMs. We administered 1, 3, or 10 mg/kg (intraperitoneally (i.p.)) of tetrabenazine or 0.3, 1, 2 or 3 mg/kg of galantamine i.p to C57Bl6/J mice and observed TJMs. For tetrabenazine, 3 and 10 mg/kg i.p significantly induced TJMs over vehicle treatment with 10 mg/kg producing a maximal effect and 3 mg/kg producing a threshold effect (Figure S1 A, One-way ANOVA with Dunnett's multiple comparisons test  $F(4,67)=31.72$   $p<0.0001$ ,  $p<0.01$  for 3 mg/kg,  $p<0.0001$  for 10 mg/kg). For galantamine, 1 and 3 mg/kg i.p significantly raised induced TJMs over vehicle treatment with 3 mg/kg producing a maximal effect and 1 mg/kg producing a threshold effect (Figure S1 B, One-way ANOVA with Dunnett's multiple comparisons test  $F(3,36)=44.92$   $p<0.0001$ ,  $p<0.05$  for 1 mg/kg,  $p<0.0001$  for 3 mg/kg).

Recent evidence suggests a unique role for M<sub>4</sub> antagonists in the treatment of movement disorders(3, 9). To determine if M<sub>4</sub> selective antagonists can recapitulate the effects of non-selective antagonists we performed a dose response curve of the M<sub>4</sub> selective antagonist VU06021625 (0, 3, 10 or 30 mg/kg s.c.) in the presence of maximally efficacious doses of tetrabenazine (10 mg/kg i.p, Figure 1A) or galantamine (3 mg/kg i.p, Figure 1B). We additionally dosed the animals with scopolamine (1 mg/kg, s.c.) in the presence of these TJM-inducing pharmacological agents as a positive control. In tetrabenazine induced TJMs, VU06021625 did not significantly alter TJM counts (Figure 1A, Mixed Effects Model with Holm-Sidak multiple comparisons test,  $p>0.05$ ). However, scopolamine significantly attenuated TJMs (Figure 1A, Mixed Effects Model with Holm-Sidak multiple comparisons test,  $p<0.05$ ). For galantamine induced TJMs, VU06021625 surprisingly facilitated tremor at higher doses while scopolamine significantly attenuated tremor (Figure 1B, Repeated measures one-way ANOVA with Sidak's multiple comparisons test  $F(2.792,25.013)=18.26$   $p<0.0001$ ,  $p<0.05$  for 10 mg/kg,  $p<0.05$  for 30 mg/kg  $p<0.0001$  for scopolamine). Taken together, this suggests that M<sub>4</sub> selective antagonists do not recapitulate the effects of non-selective antagonists and may even potentiate tremor in some circumstances.

### **Figure 1. M<sub>4</sub> Selective Antagonists Do Not Recapitulate Non-selective**

**Antagonists. A)** Dose response curve of VU06021625 (0-30 mg/kg s.c.) in tetrabenazine induced tremulous jaw movements. The positive control scopolamine (1 mg/kg s.c.) was the only compound that reduced tremor. **B)** Dose response curve of VU06021625 (0-30 mg/kg s.c.) in galantamine induced tremulous jaw movements. Higher doses of VU06021625 potentiated TJM counts while scopolamine (1 mg/kg s.c.)



decreased TJM counts. N=10 per group. Data in A were analyzed with a mixed effects model with Holm-Sidak multiple comparisons test. Data in B were analyzed with a repeated measures one-way ANOVA with Sidak's multiple comparisons test. \* $p < 0.05$ , and \*\*\*\* $p < 0.0001$

### *M1 Antagonists Do Not Reduce TJMs*

$M_1$  has previously been implicated in having a role in modulating the parkinsonian basal ganglia(16, 17). To determine if  $M_1$  selective antagonists can recapitulate the effects of non-selective antagonists we performed a dose response curve of the  $M_1$  selective antagonist VU0255035 (0, 1, 3, or 10 mg/kg s.c.) in the presence of maximally efficacious doses of tetrabenazine (10 mg/kg i.p, Figure 2A) or galantamine (3 mg/kg i.p, Figure 2B). As before, we additionally dosed the animals with scopolamine (1 mg/kg, s.c.) in the presence of these TJM inducing pharmacological agents as a positive control. In tetrabenazine or galantamine induced TJMs, VU0255035 did not significantly alter TJM counts (Figure 2A (tetrabenazine), Repeated measures one-way ANOVA with Dunnett's multiple comparisons test  $F(2.559, 17.91)=4.428$   $p < 0.05$ , not significant for all doses, Figure 2B (galantamine) Repeated measures one-way ANOVA with Dunnett's multiple comparisons test  $F(1.828, 12.79)=5.5357$ ,  $p < 0.05$ , not significant for all doses). However, scopolamine significantly attenuated TJMs in both models (Figure 2A (tetrabenazine), Repeated measures one-way ANOVA with Dunnett's multiple comparisons test  $F(2.559, 17.91)=4.428$   $p < 0.05$ ,  $p < 0.01$  for scopolamine, Figure 2B (galantamine) Repeated measures one-way ANOVA with Dunnett's multiple comparisons test  $F(1.828, 12.79)=5.5357$ ,  $p < 0.05$ ,  $p < 0.001$  for

scopolamine). This suggests that M<sub>1</sub> selective antagonists do not recapitulate the effects of non-selective antagonists.

## **Figure 2. M<sub>1</sub> Selective Antagonists Do Not Recapitulate Non-selective**

**Antagonists. A)** Dose response curve of VU0255035 (1-10 mg/kg s.c.) in tetrabenazine induced tremulous jaw movements. The positive control scopolamine (1 mg/kg s.c.) was the only compound that reduced tremor. **B)** Dose response curve of VU0255035 (1-10 mg/kg s.c.) in galantamine induced tremulous jaw movements. Only Scopolamine significantly reduced TJM counts N=8-9 per group. Data were analyzed with a repeated measures one-way ANOVA with Dunnett's multiple comparisons test. \*\*p<0.01, and \*\*\*p<0.001

### *M<sub>5</sub> Antagonists Do Not Reduce TJMs*

M<sub>5</sub> is unique among mAChRs in that its expression is largely limited to midbrain dopaminergic neurons(15, 25, 26). To determine if M<sub>5</sub> selective antagonists can recapitulate the effects of non-selective antagonists we performed a dose response curve of the M<sub>5</sub> selective negative allosteric modulator ML375 (0, 3, 10, or 30 mg/kg s.c.) in the presence of maximally efficacious doses of tetrabenazine (10 mg/kg i.p, Figure 3A) or galantamine (3 mg/kg i.p, Figure 3B). In tetrabenazine or galantamine induced TJMs, ML375 did not significantly alter TJM counts (Figure 3A (tetrabenazine), Friedman's test with Dunnett's multiple comparisons test Friedman=16.00 p<0.05, not significant for all doses, Figure 2B (galantamine) Repeated measures one-way ANOVA with Dunnett's multiple comparisons test F(2.452, 17.16)=1.217, p<0.05, not significant for all doses). However, scopolamine significantly attenuated TJMs in the TBZ model (Figure 3A Friedman's test with Dunnett's multiple comparisons test Friedman=16.00

$p < 0.05$ ,  $p < 0.05$  for scopolamine). Interestingly, when all vehicle and scopolamine data were pooled from all antagonist groups, scopolamine was always highly efficacious in reducing TJM counts in either pharmacological model (Figure S2. Paired t test (A)  $t = 8.350$   $df = 23$ , (B)  $t = 8.292$   $df = 18$ ,  $p < 0.0001$ ). This suggests that  $M_5$  selective antagonists do not recapitulate the effects of non-selective antagonists.

### **Figure 3. $M_5$ Selective Antagonists Do Not Recapitulate Non-selective**

**Antagonists. A)** Dose response curve of ML375 (3-30 mg/kg s.c.) in tetrabenazine induced tremulous jaw movements. The positive control scopolamine (1 mg/kg s.c.) was the only compound that reduced tremor. **B)** Dose response curve of ML375 (3-30 mg/kg s.c.) in galantamine induced tremulous jaw movements.  $N = 7-8$  per group. Data in A were analyzed with a Friedman's test with a Dunnett's multiple comparisons test. Data in B were analyzed with a repeated measures one-way ANOVA with Dunnett's multiple comparisons test.  $*p < 0.05$

### ***M4 PAMs Do Not Modulate TJMs***

Due to our results suggesting that  $M_4$  antagonism does not decrease TJMs, we tested if the reverse experiment, boosting  $M_4$  signaling, would alleviate tremor in a manner similar to non-selective mAChR antagonists. To determine if  $M_4$  selective positive allosteric modulators can alleviate tremor we performed a dose response curve of the  $M_4$  selective positive allosteric modulator VU0467154 (0, 0.3, 1, or 3 mg/kg s.c.) in the presence of a minimally efficacious doses of tetrabenazine (3 mg/kg i.p, Figure 4A) or galantamine (1 mg/kg i.p, Figure 4B). In tetrabenazine or galantamine induced TJMs, VU0467154 did not significantly increase TJM counts (Figure 4A (tetrabenazine), Repeated measures one-way ANOVA with Dunnett's multiple comparisons test  $F(2.6,$

15.60)=5.038  $p < 0.05$ , not significant for all doses, Figure 2B (galantamine) Repeated measures one-way ANOVA with Dunnett's multiple comparisons test  $F(2.980, 23.84)=6.536$ ,  $p < 0.05$ , not significant for all doses). This suggests increasing  $M_4$  activity through  $M_4$  selective positive allosteric modulators do not modulate TJMs.

#### **Figure 4. $M_4$ Selective Positive Allosteric Modulators Do Not Modulate Tremulous**

**Jaw Movements. A)** Dose response curve of VU0467154 (0.3-3 mg/kg s.c.) in modulating a threshold dose of tetrabenazine. **B)** Dose response curve of VU0467154 (0.3-3 mg/kg s.c.) in modulating a threshold dose of galantamine induced tremulous jaw movements. N=7-9 per group. Data were analyzed with a repeated measures one-way ANOVA with Dunnett's multiple comparisons test

#### *M1 PAMs Do Not Modulate TJMs*

As with  $M_4$  modulation, we tested if the reverse experiment, boosting  $M_1$  signaling, would alleviate tremor in a manner similar to non-selective mAChR antagonists. To determine if  $M_1$  selective positive allosteric modulators can alleviate tremor we performed a dose response curve of the  $M_1$  selective positive allosteric modulator VU0453595 (0, 1, 3, or 10 mg/kg s.c.) in the presence of a minimally efficacious doses of tetrabenazine (3 mg/kg i.p, Figure 4A) or galantamine (1 mg/kg i.p, Figure 4B). In tetrabenazine or galantamine induced TJMs, VU0453595 did not significantly increase TJM counts (Figure 5A (tetrabenazine), Repeated measures one-way ANOVA with Dunnett's multiple comparisons test  $F(1.607, 11.25)=2.703$   $p > 0.05$ , not significant for all doses, Figure 5B (galantamine) , Mixed Effects Model with Holm-Sidak multiple comparisons test,  $p > 0.05$ , not significant for all doses). This suggests

increasing  $M_1$  activity through  $M_1$  selective positive allosteric modulators do not modulate TJMs.

**Figure 5.  $M_1$  Selective Positive Allosteric Modulators Do Not Modulate Tremulous Jaw Movements.** **A)** Dose response curve of VU0453595 (1-10 mg/kg s.c.) in modulating a threshold dose of tetrabenazine. **B)** Dose response curve of VU0453595 (1-10 mg/kg s.c.) in modulating a threshold dose of galantamine induced tremulous jaw movements. N=8-10 per group. Data in A were analyzed with a repeated measures one-way ANOVA with Dunnett's multiple comparisons test. Data in B were analyzed with a mixed effects model with Holm-Sidak multiple comparisons test

## Discussion

Pharmacological advances have allowed for the development of truly mAChR subtype selective pharmacological tool compounds that enable dissection of the roles of individual mAChR subtypes in normal physiology and in disease states(3, 10, 11). These advances have placed a renewed excitement in utilizing cholinergic agents clinically as the adverse effects traditionally associated with mAChRs may be avoided or greatly reduced. However, careful pre-clinical work must be done to understand the extent and mechanisms of potential efficacy of these selective compounds.

Recent studies have implicated that, in pre-clinical models of anti-parkinsonian efficacy, antagonism of  $M_4$  underlies the majority of efficacy seen with non-selective mAChR antagonists(9). Previous studies have also implicated a role for  $M_1$  (17). However, these animal models, forelimb asymmetry and haloperidol induced catalepsy, primarily model the hypokinetic motor deficits of PD while tremor is hyperkinetic. They implicate a unique role for  $M_1$  and  $M_4$  in the physiology of the hypokinetic motor

symptoms of PD. Our data using highly selective pharmacological tools to both antagonize or potentiate  $M_1$ ,  $M_4$ , and  $M_5$  implicate that these brain predominant mAChRs are not the primary mAChRs that are responsible for modulating tremor. This indicates a possible dissociation of the mechanisms or circuits which underlie hypokinetic and hyperkinetic motor symptoms of PD.

The only departure to a lack of efficacy in our data is  $M_4$  antagonists potentiating tremor in the galantamine model. It should be noted that this only happens at doses in excess of those necessary for anti-parkinsonian and anti-dystonic efficacy, suggesting that  $M_4$  antagonists will be able to relieve hypokinetic motor deficits without potentiation other motor symptoms(9). The differences between effects in the tetraabenazine and galantamine TJM model may also indicate that distinct mechanisms are engaged to induce tremor. For example, based on the expression profile of  $M_4$  in the striatum, it may be possible that  $M_4$  antagonism increases TJM through inhibiting  $M_4$  on striatal cholinergic interneurons and further increased acetylcholine concentrations in the striatum to induce tremor, whereas this cholinergic interneuron mechanism may not be engaged by tetraabenazine administration(18-20, 27).

The lack of efficacy seen with  $M_1$ ,  $M_4$ , and  $M_5$  antagonists in our pharmacological models of TJMs indicates that the observed efficacy of non-selective antagonists may be due to antagonism of  $M_2$  or  $M_3$  mAChRs. Previous studies have also suggested the possible role of  $M_2$  antagonism in tremor, as global  $M_2$  knockout mice were less sensitive to the tremor inducing mAChR agonist oxotremorine(28). Due to the classic peripheral adverse effects associated with non-selective mAChR therapeutics possibly being linked to actions at  $M_2$  or  $M_3$ , this may indicate that targeting mAChRs for tremor

may not be dissociable from adverse effects, and other novel strategies for decreasing tremor in PD may be warranted.

Our data also raise the question of which circuits and organs anti-mAChR therapeutics are acting on for anti-tremor efficacy. While not as highly expressed as M<sub>1</sub>, M<sub>4</sub>, and M<sub>5</sub> are in the brain, nevertheless, M<sub>2</sub> and M<sub>3</sub> are still found in the brain. Notably, M<sub>2</sub> is expressed on cholinergic interneurons in the striatum, which are critical regulators of basal ganglia processing(12, 15). Additionally, M<sub>3</sub> is expressed in several brain nuclei which may influence basal ganglia processing associated with PD pathophysiology(12, 15). This expression profile suggests that there may be several central mechanisms by which antagonism of M<sub>2</sub> or M<sub>3</sub> may alter tremor.

M<sub>2</sub> and M<sub>3</sub> are also expressed throughout several peripheral sites including muscle and lower motor neurons(15). Our data cannot rule out the possibility that non-selective antagonists are acting on peripheral M<sub>2</sub> or M<sub>3</sub> receptors. While PD is more classically associated with upper motor neurons, it is possible that antagonism of M<sub>2</sub> or M<sub>3</sub> in the periphery somehow blocks or attenuates the expression of tremor at the level of the muscle or lower motor neurons. Further exploration of this possibility of anti-mAChR action at peripheral sites in relevant animal models of disease will be necessary.

While surprising that M<sub>1</sub>, M<sub>4</sub>, or M<sub>5</sub> do not modulate tremor as has been implicated with other motor symptoms of PD, these data implicating unique roles for M<sub>2</sub> or M<sub>3</sub> are critical for our understanding of the mAChR mediated mechanisms in PD. These studies help to inform future clinical trials about the potential efficacy of subtype selective mAChRs as they progress to the clinic. Additionally, these studies illustrate the need to

mechanistically understand how tremor is induced for the rational design of novel therapeutic strategies for tremor.

## Acknowledgements

We would like to thank Drs. P Jeffrey Conn and Craig Lindsley for the gifts of the experimental compounds used in these experiments and their time in discussing these data.

## Works Cited

1. Korczyn AD. Drug treatment of Parkinson's disease. *Dialogues Clin Neurosci*. 2004;6(3):315-22.
2. Albin RL, Young AB, Penney JB. The functional anatomy of basal ganglia disorders. *Trends in neurosciences*. 1989;12(10):366-75.
3. Moehle MS, Conn PJ. Roles of the M4 acetylcholine receptor in the basal ganglia and the treatment of movement disorders. 2019;34(8):1089-99.
4. Hermanowicz N, Castillo-Shell M, McMean A, Fishman J, D'Souza J. Patient and physician perceptions of disease management in Parkinson's disease: results from a US-based multicenter survey. *Neuropsychiatr Dis Treat*. 2019;15:1487-95.
5. Port RJ, Rumsby M, Brown G, Harrison IF, Amjad A, Bale CJ. People with Parkinson's Disease: What Symptoms Do They Most Want to Improve and How Does This Change with Disease Duration? *Journal of Parkinson's disease*. 2021;11(2):715-24.
6. Heusinkveld LE, Hacker ML, Turchan M, Davis TL, Charles D. Impact of Tremor on Patients With Early Stage Parkinson's Disease. *Frontiers in neurology*. 2018;9:628-.



7. Fahn S, Burke R, Stern Y. Antimuscarinic drugs in the treatment of movement disorders. *Progress in brain research*. 1990;84:389-97.
8. Unna KR, Vernier VG. The experimental evaluation of antiparkinsonian compounds. *Annals of the New York Academy of Sciences*. 1956;64(4):690-704.
9. Moehle MS, Bender AM, Dickerson JW, Foster DJ, Qi A, Cho HP, et al. Discovery of the First Selective M4 Muscarinic Acetylcholine Receptor Antagonists with in Vivo Antiparkinsonian and Antidystonic Efficacy. *ACS Pharmacology & Translational Science*. 2021.
10. Conn PJ, Jones CK, Lindsley CW. Subtype-selective allosteric modulators of muscarinic receptors for the treatment of CNS disorders. *Trends in pharmacological sciences*. 2009;30(3):148-55.
11. Moran SP, Maksymetz J, Conn PJ. Targeting Muscarinic Acetylcholine Receptors for the Treatment of Psychiatric and Neurological Disorders. *Trends in pharmacological sciences*. 2019;40(12):1006-20.
12. Levey AI, Kitt CA, Simonds WF, Price DL, Brann MR. Identification and localization of muscarinic acetylcholine receptor proteins in brain with subtype-specific antibodies. *The Journal of neuroscience : the official journal of the Society for Neuroscience*. 1991;11(10):3218-26.
13. Peters NL. Snipping the thread of life. Antimuscarinic side effects of medications in the elderly. *Archives of internal medicine*. 1989;149(11):2414-20.
14. Andersson K-E, Campeau L, Olshansky B. Cardiac effects of muscarinic receptor antagonists used for voiding dysfunction. *Br J Clin Pharmacol*. 2011;72(2):186-96.

15. Brann MR, Ellis J, Jørgensen H, Hill-Eubanks D, Jones SV. Muscarinic acetylcholine receptor subtypes: localization and structure/function. *Progress in brain research*. 1993;98:121-7.
16. Chambers NE, Meadows SM, Taylor A, Sheena E, Lanza K, Conti MM, et al. Effects of Muscarinic Acetylcholine m1 and m4 Receptor Blockade on Dyskinesia in the Hemi-Parkinsonian Rat. *Neuroscience*. 2019;409:180-94.
17. Ztaou S, Maurice N, Camon J, Guiraudie-Capraz G, Kerkerian-Le Goff L, Beurrier C, et al. Involvement of Striatal Cholinergic Interneurons and M1 and M4 Muscarinic Receptors in Motor Symptoms of Parkinson's Disease. *The Journal of neuroscience : the official journal of the Society for Neuroscience*. 2016;36(35):9161-72.
18. Collins-Praino LE, Paul NE, Rychalsky KL, Hinman JR, Chrobak JJ, Senatus PB, et al. Pharmacological and physiological characterization of the tremulous jaw movement model of parkinsonian tremor: potential insights into the pathophysiology of tremor. *Front Syst Neurosci*. 2011;5:49-.
19. Salamone JD, Mayorga AJ, Trevitt JT, Cousins MS, Conlan A, Nawab A. Tremulous jaw movements in rats: a model of parkinsonian tremor. *Progress in neurobiology*. 1998;56(6):591-611.
20. Collins LE, Paul NE, Abbas SF, Leser CE, Podurgiel SJ, Galtieri DJ, et al. Oral tremor induced by galantamine in rats: a model of the parkinsonian side effects of cholinomimetics used to treat Alzheimer's disease. *Pharmacology, biochemistry, and behavior*. 2011;99(3):414-22.
21. Bubser M, Bridges TM, Dencker D, Gould RW, Grannan M, Noetzel MJ, et al. Selective activation of M4 muscarinic acetylcholine receptors reverses MK-801-induced

behavioral impairments and enhances associative learning in rodents. ACS Chem Neurosci. 2014;5(10):920-42.

22. Panarese JD, Cho HP, Adams JJ, Nance KD, Garcia-Barrantes PM, Chang S, et al. Further optimization of the M1 PAM VU0453595: Discovery of novel heterobicyclic core motifs with improved CNS penetration. Bioorg Med Chem Lett. 2016;26(15):3822-5.

23. Sheffler DJ, Williams R, Bridges TM, Xiang Z, Kane AS, Byun NE, et al. A novel selective muscarinic acetylcholine receptor subtype 1 antagonist reduces seizures without impairing hippocampus-dependent learning. Molecular pharmacology. 2009;76(2):356-68.

24. Gentry PR, Kokubo M, Bridges TM, Kett NR, Harp JM, Cho HP, et al. Discovery of the First M5-Selective and CNS Penetrant Negative Allosteric Modulator (NAM) of a Muscarinic Acetylcholine Receptor: (S)-9b-(4-Chlorophenyl)-1-(3,4-difluorobenzoyl)-2,3-dihydro-1H-imidazo[2,1-a]isoindol-5(9bH)-one (ML375). Journal of medicinal chemistry. 2013;56(22):9351-5.

25. Foster DJ, Gentry PR, Lizardi-Ortiz JE, Bridges TM, Wood MR, Niswender CM, et al. M5 receptor activation produces opposing physiological outcomes in dopamine neurons depending on the receptor's location. The Journal of neuroscience : the official journal of the Society for Neuroscience. 2014;34(9):3253-62.

26. Wess J, Eglen RM, Gautam D. Muscarinic acetylcholine receptors: mutant mice provide new insights for drug development. Nature Reviews Drug Discovery. 2007;6(9):721-33.

27. Bonsi P, Cuomo D, Martella G, Madeo G, Schirizzi T, Puglisi F, et al. Centrality of striatal cholinergic transmission in Basal Ganglia function. *Front Neuroanat.* 2011;5:6-.
28. Gomeza J, Shannon H, Kostenis E, Felder C, Zhang L, Brodtkin J, et al. Pronounced pharmacologic deficits in M2 muscarinic acetylcholine receptor knockout mice. 1999;96(4):1692-7.

## Supplemental Information

**Figure S1. Dose Response Curves of Tetrabenazine and Galantamine to Induce Tremulous Jaw Movements. A)** Dose response curve of tetrabenazine (0-10 mg/kg i.p..) to induce tremulous jaw movements. 3 mg/kg produced a threshold induction of TJMs while 10 mg/kg induced a maximal amount. **B)** Dose response curve of galantamine (0-30 mg/kg s.c.) to induce tremulous jaw movements. 1 mg/kg produced a threshold induction of TJMs while 3 mg/kg induced a maximal amount. N=10-15 per group. Data were analyzed with a one-way ANOVA with Dunnett's multiple comparisons test. \*p<0.05, \*\*p<0.05 and \*\*\*\*p<0.0001

**Figure S2. Scopolamine is efficacious in removing Tremulous Jaw Movements. A)** Scopolamine (1 mg/kg i.p..) reduces tetrabenazine induced tremulous jaw movements. **B)** Scopolamine (1 mg/kg i.p..) reduces galantamine induced tremulous jaw movements . N=19-24 per group. Data were analyzed with a paired t-test. \*\*\*\*p<0.0001

**A**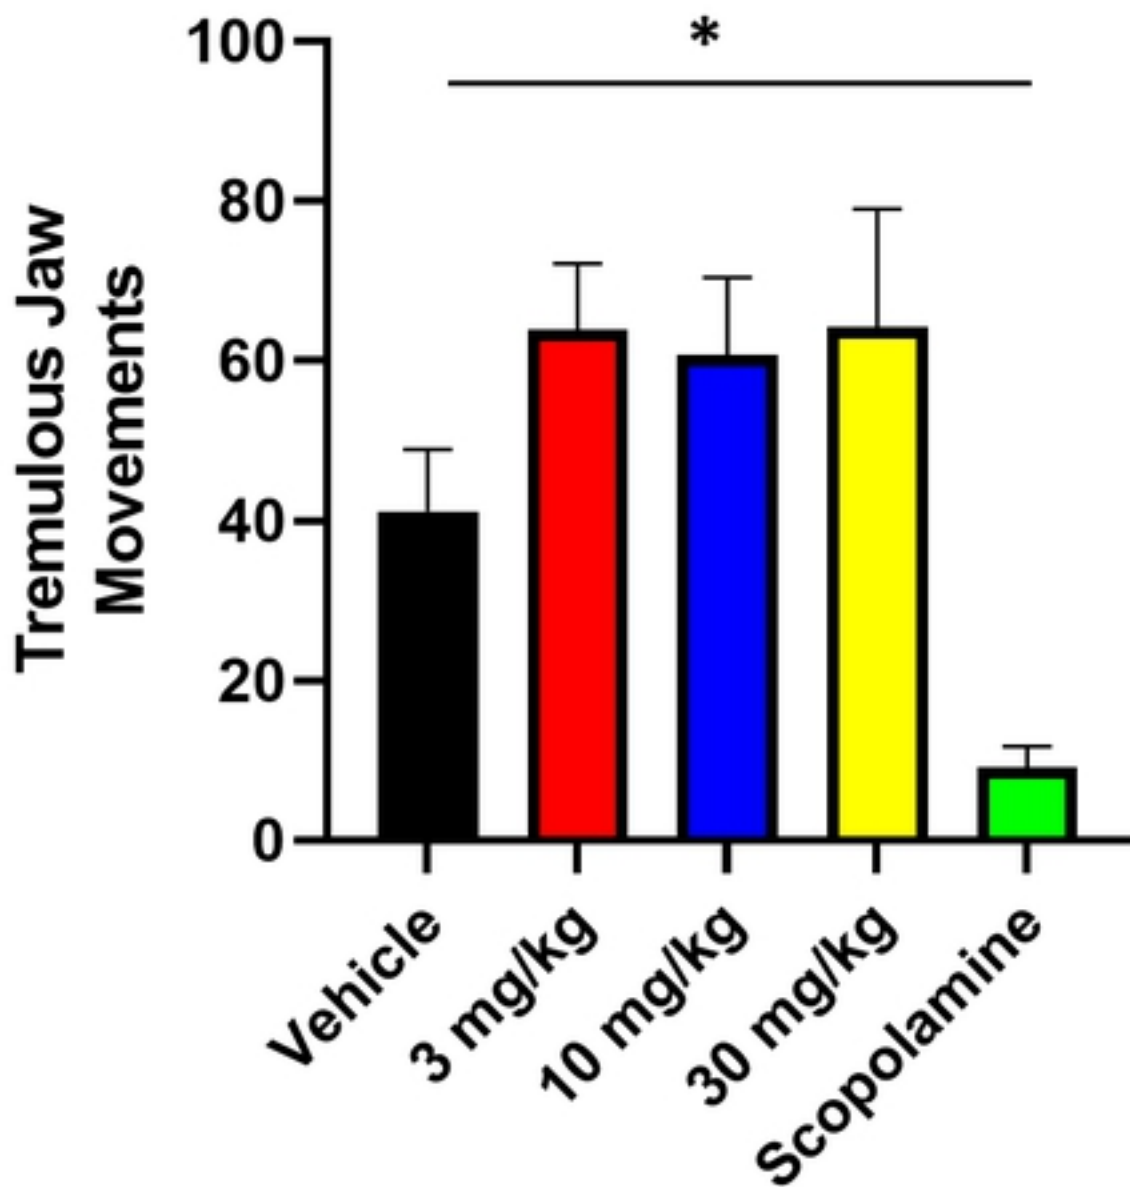**B**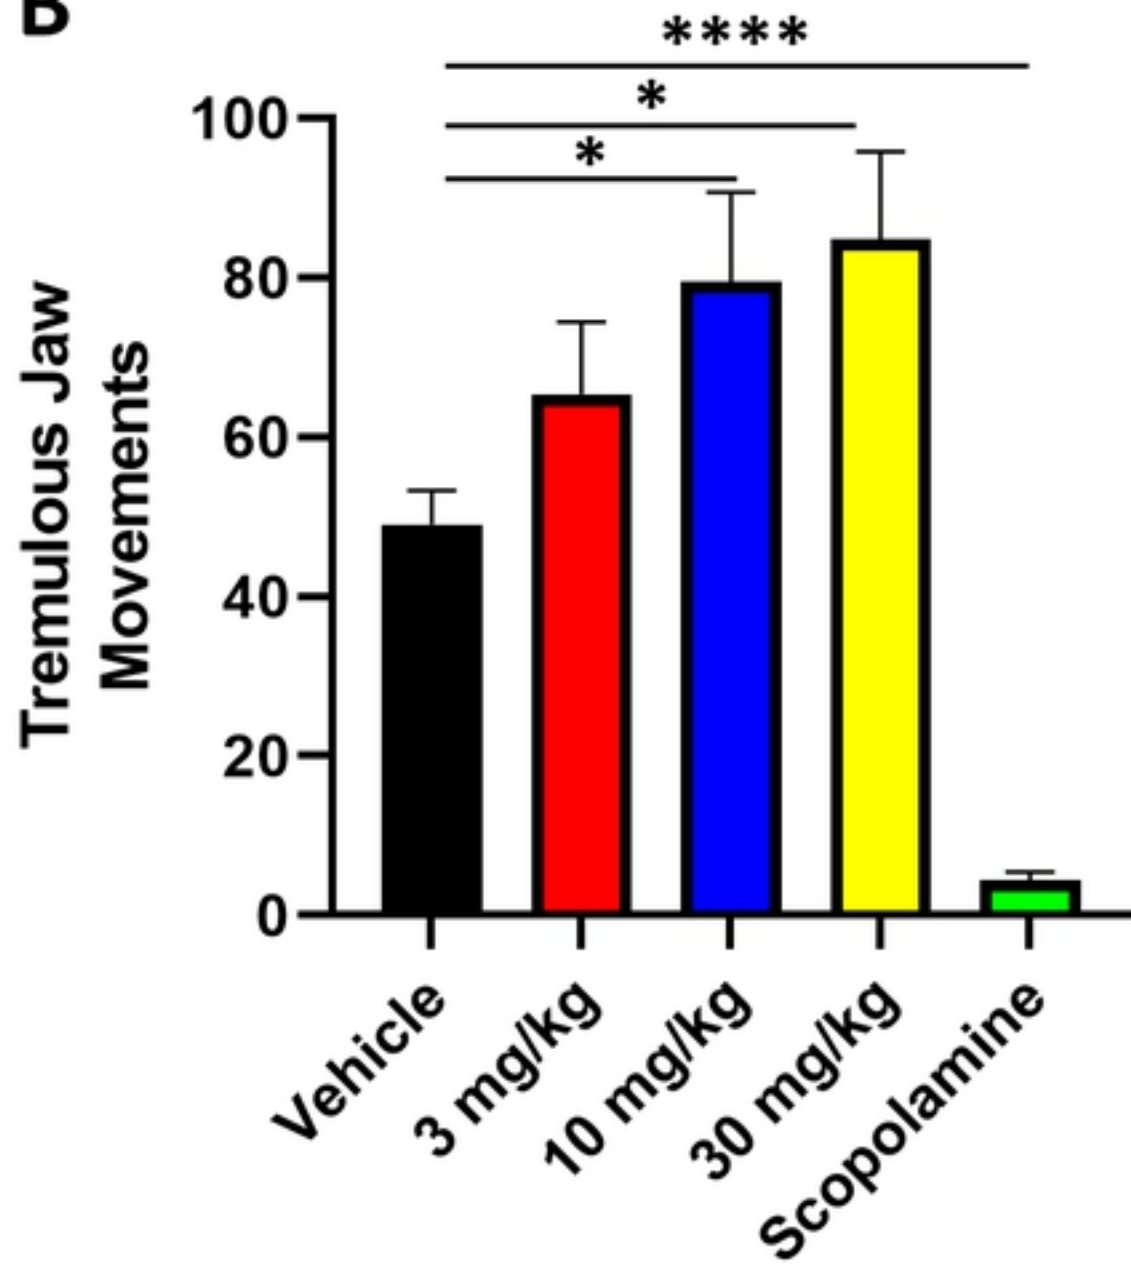

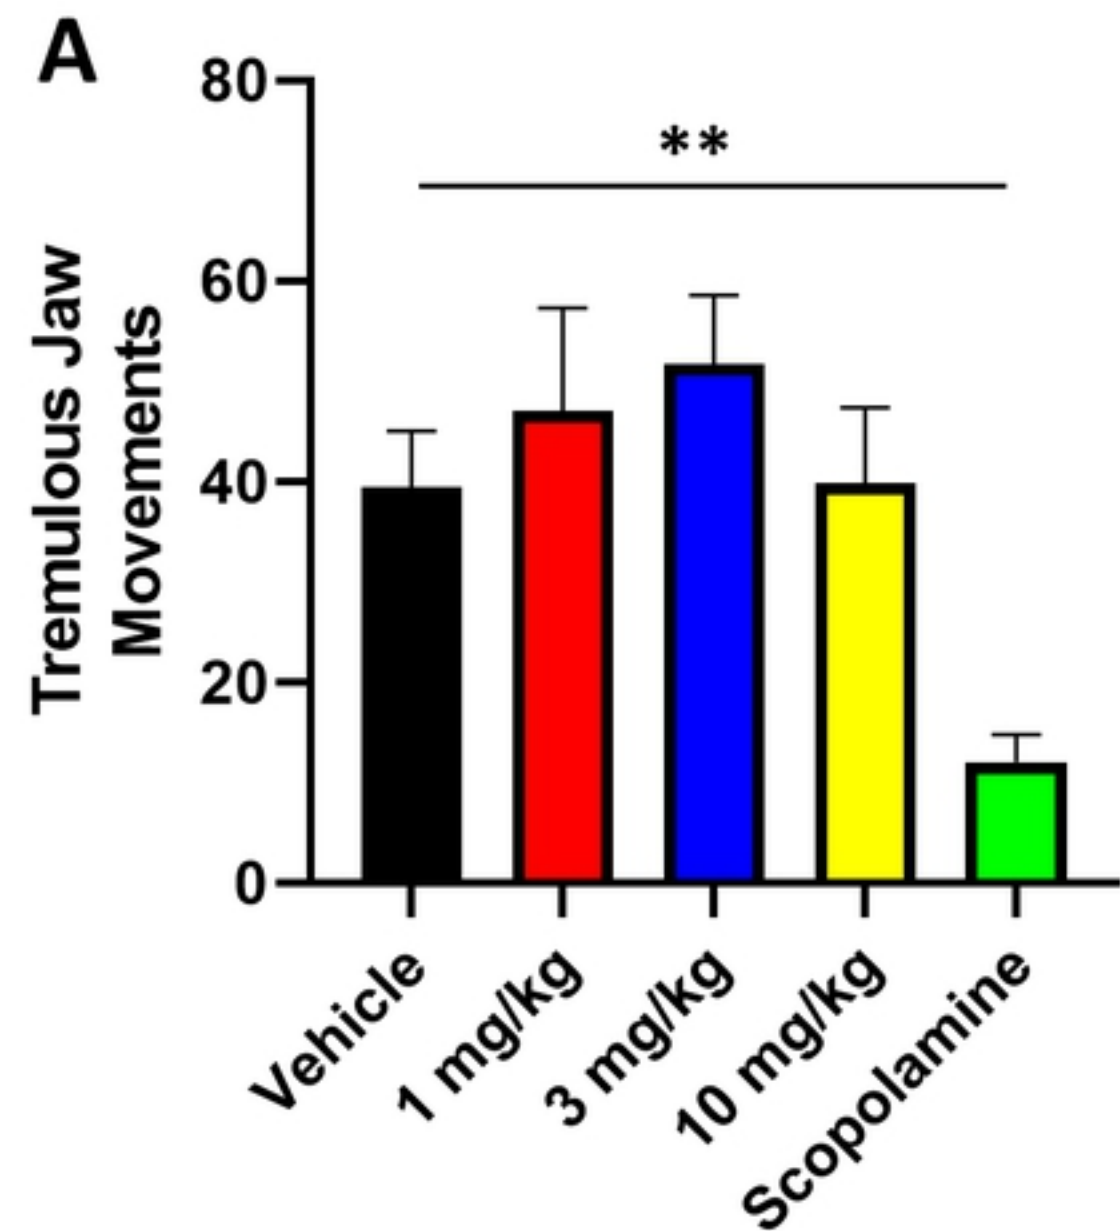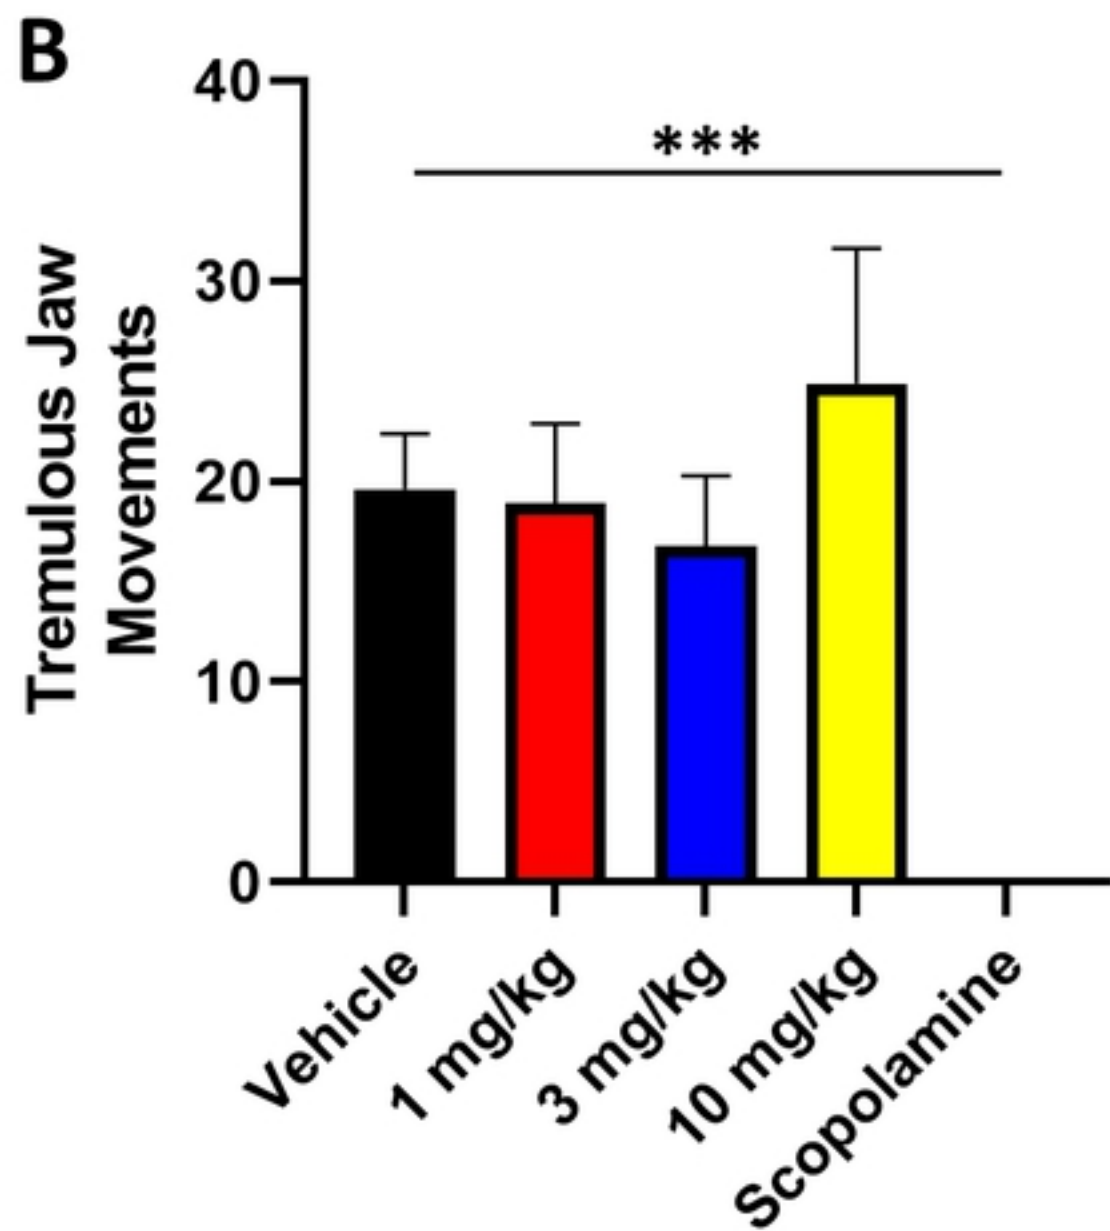

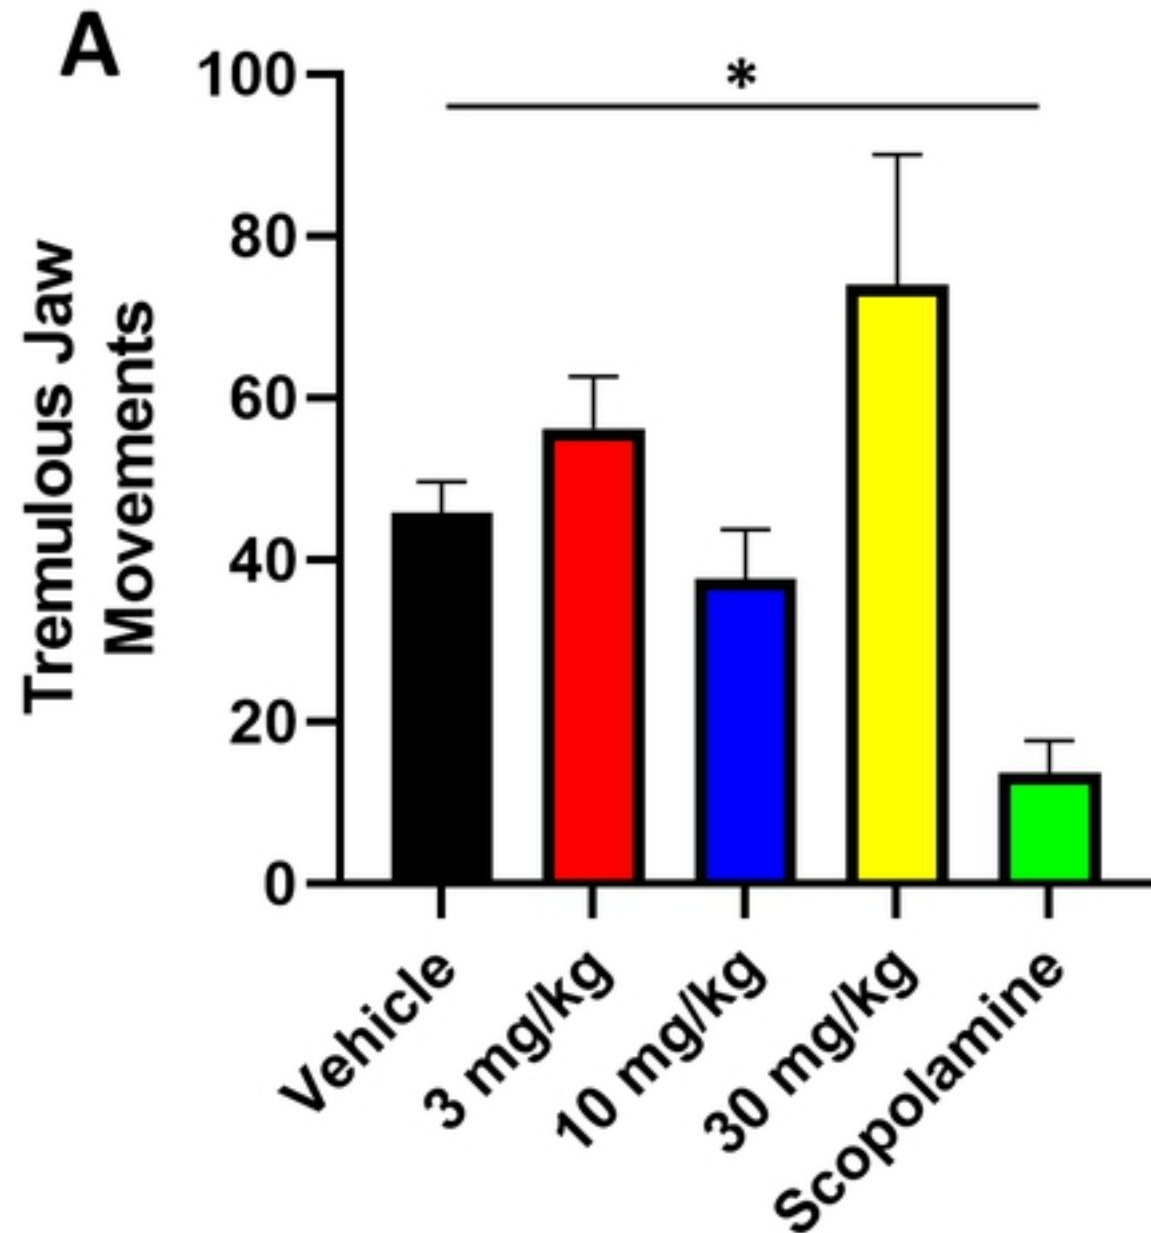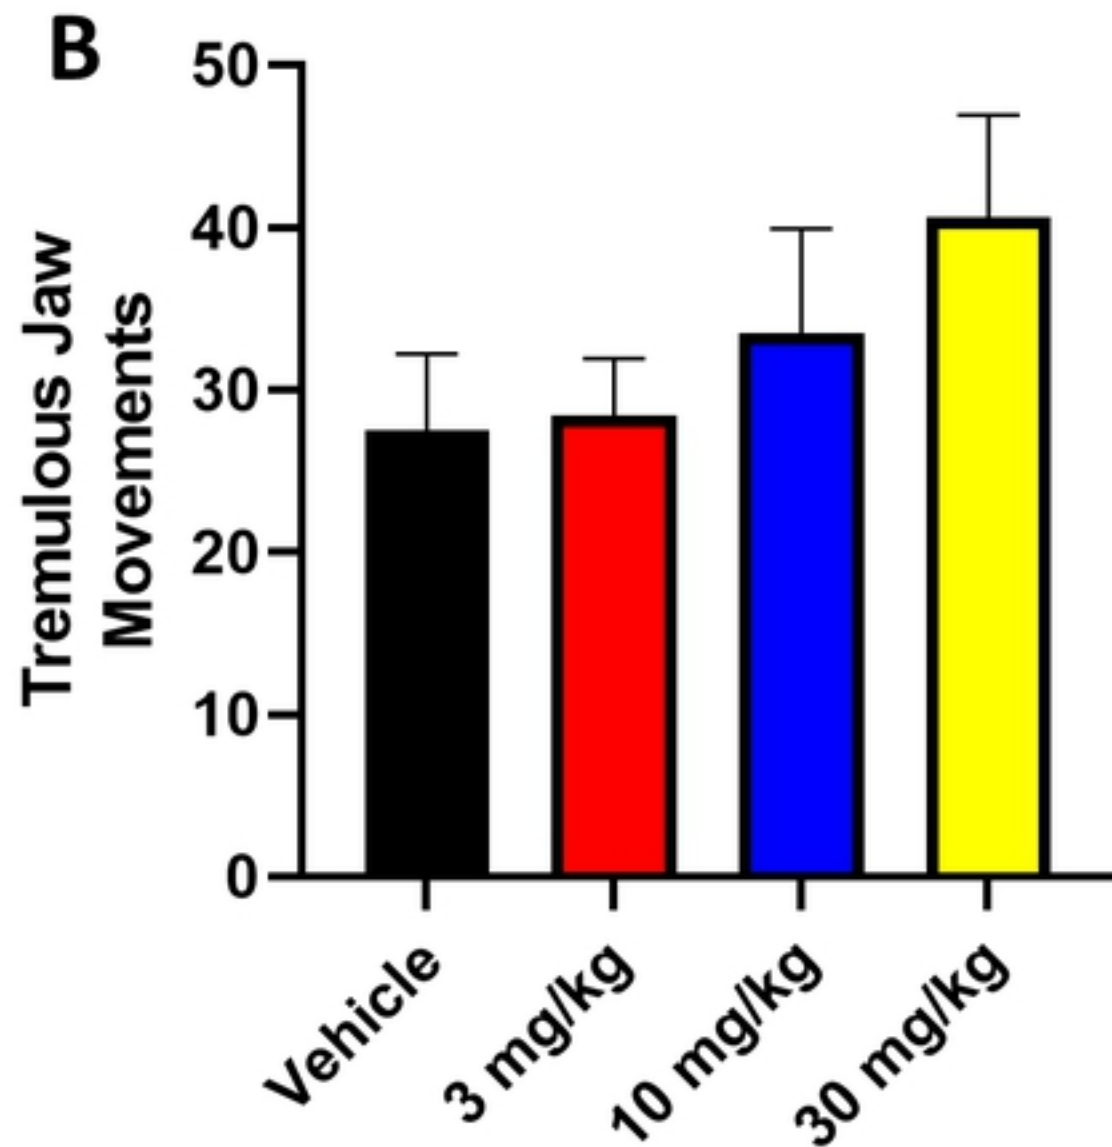

**A**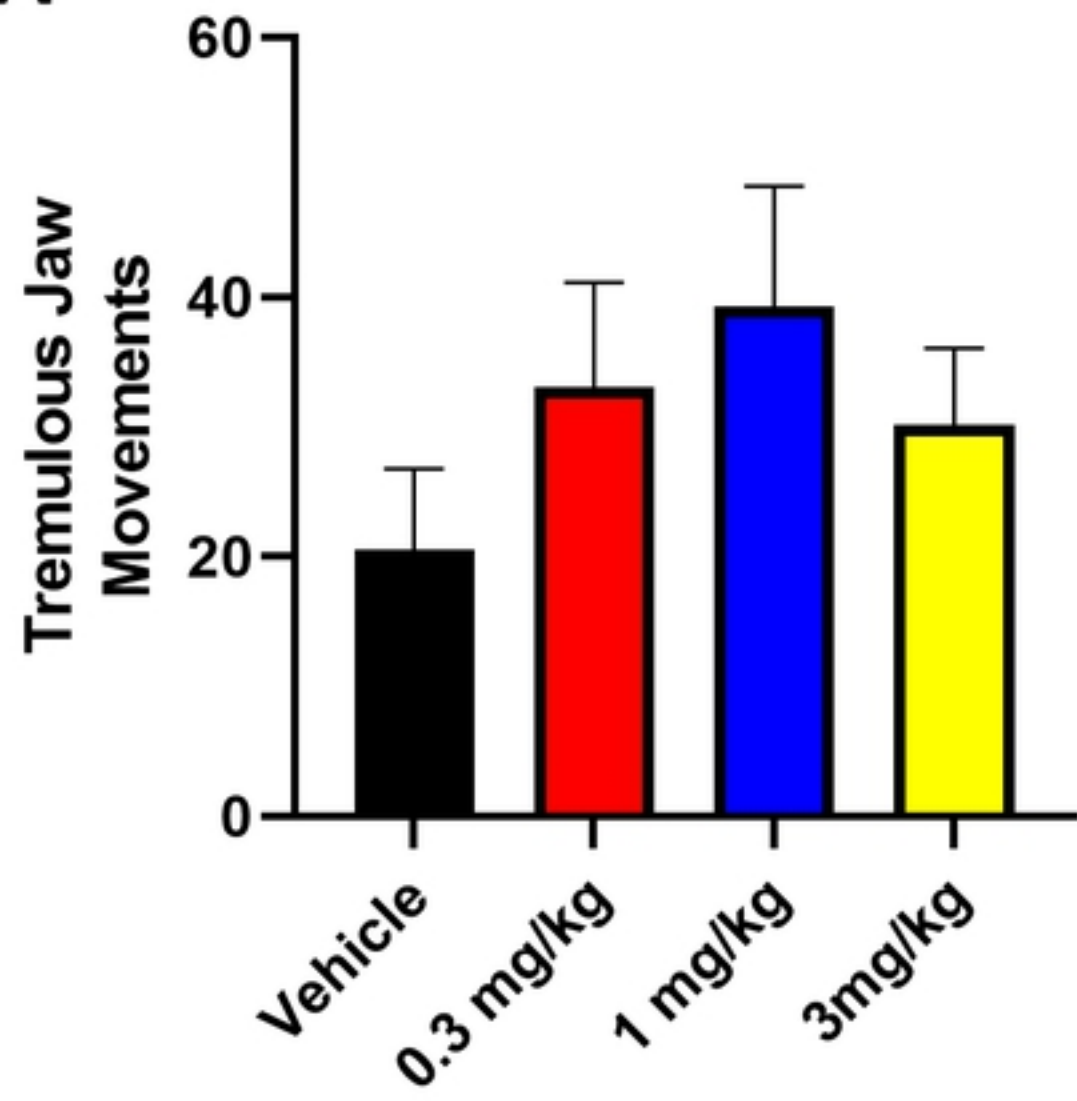**B**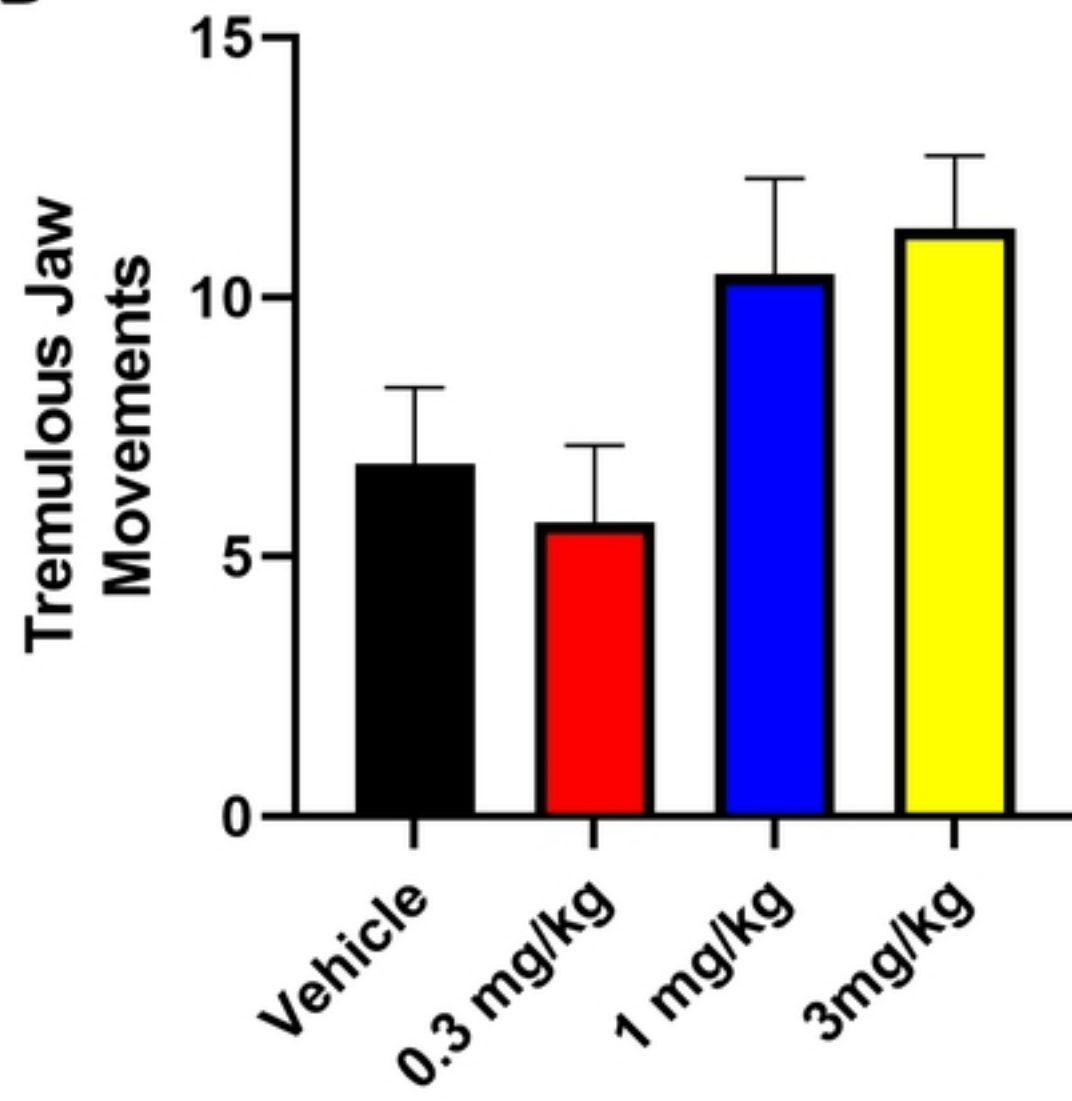



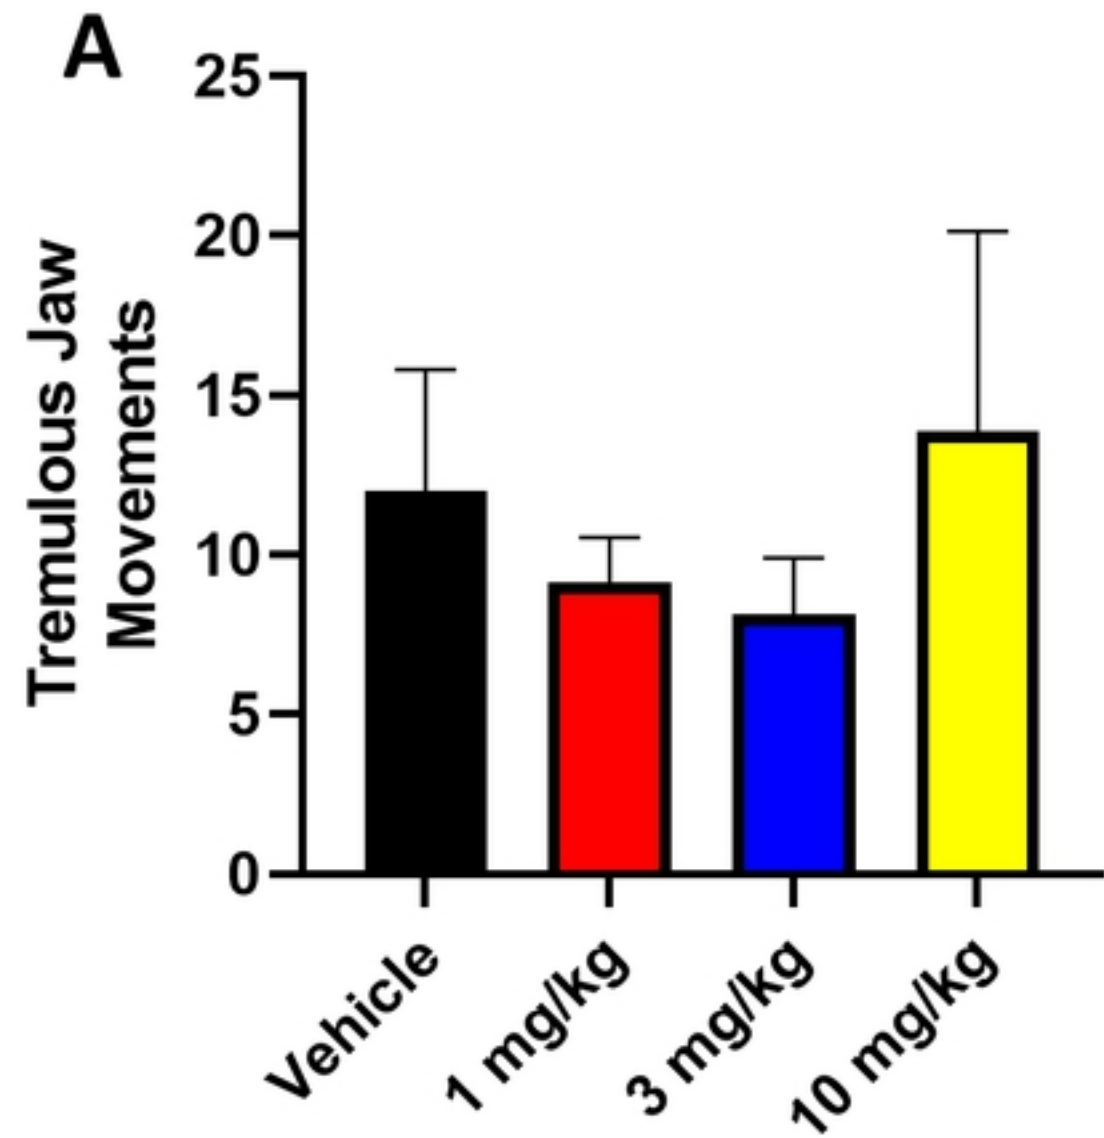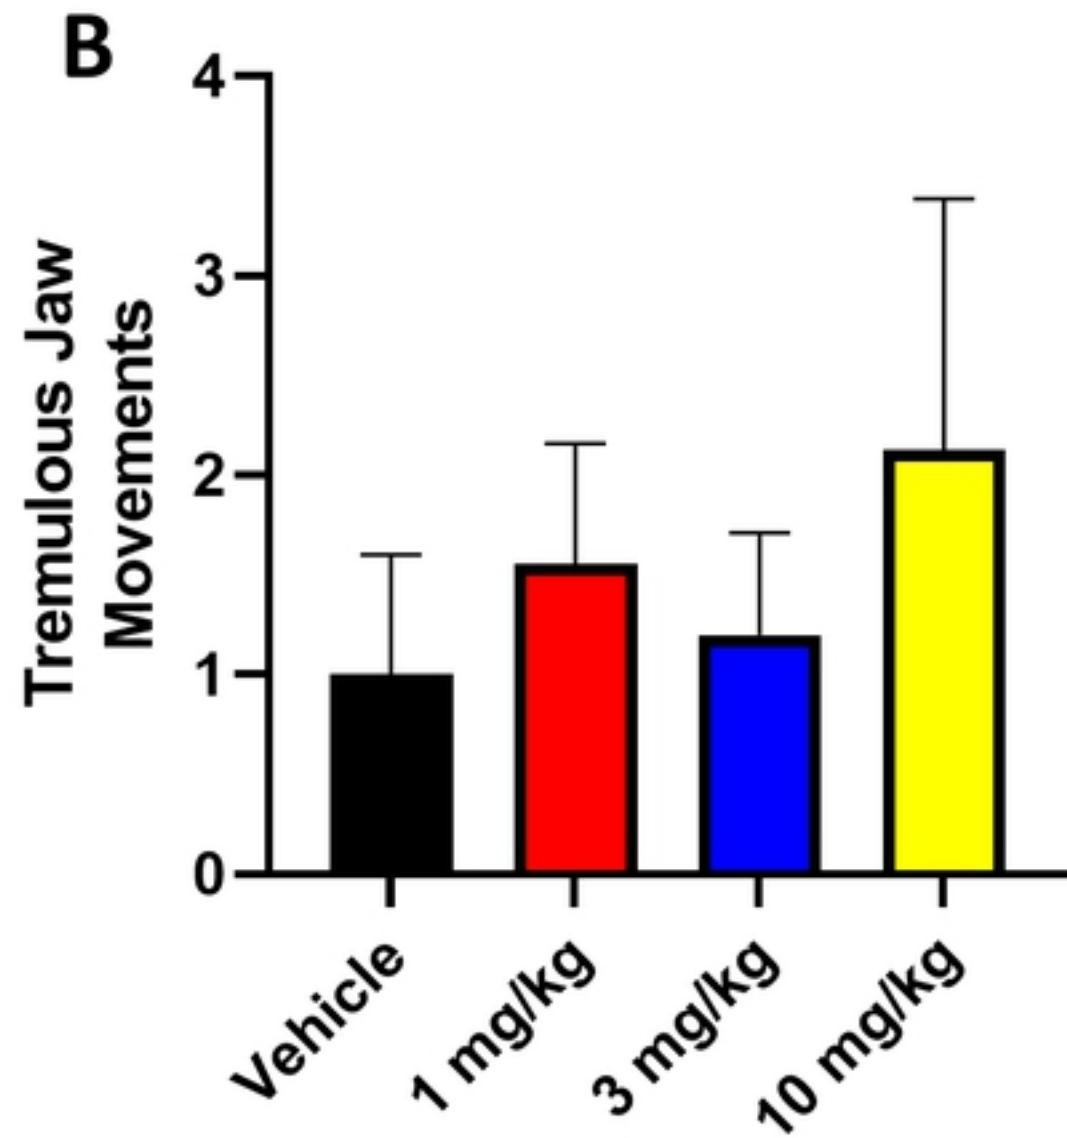

Source: http://biorxiv.org/content/10.1101/2022.04.04.487007v1.full.pdf
